# Supplementary material
Source: Royal Society of Chemistry journal article supplement (doi:10.1039/d5ja00519a)
Supplement: d5ja00519a1.pdf [file d5ja00519a1.pdf]

Correlation matrix.xlsx

|                       | Extraction<br>[V] | Focus[V] | Source<br>Quad1[V] | Foc-Quad<br>1[V] | Rot-Quad<br>2[V] | Source<br>Offset[V] | Matsuda<br>Plate[V] | Cool<br>Gas[l/min] | Aux<br>Gas[l/min] | Sample<br>Gas[l/min] | Add<br>Gas[l/min] | Org<br>Gas[l/min] | Operation<br>Power[W] |
|-----------------------|-------------------|----------|--------------------|------------------|------------------|---------------------|---------------------|--------------------|-------------------|----------------------|-------------------|-------------------|-----------------------|
| Extraction[V]         | 1                 | 0.0359   | 0.0445             | -0.0074          | -0.0325          | -0.0146             | -0.0045             | -0.0500            | -0.0111           | 0.0108               | -0.0135           | 0.0243            | -0.0066               |
| Focus[V]              | 0.0359            | 1        | -0.2181            | 0.1053           | -0.4561          | 0.0747              | 0.1222              | -0.5477            | -0.1774           | 0.1988               | -0.1208           | 0.1411            | -0.0338               |
| Source Quad1[V]       | 0.0445            | -0.2181  | 1                  | 0.2433           | 0.3953           | -0.2027             | 0.2858              | 0.2684             | 0.2840            | 0.0172               | -0.0394           | -0.2242           | 0.0329                |
| Rot-Quad1[V]          | 0.0348            | -0.0812  | 0.0583             | -0.0595          | 0.2284           | -0.3672             | -0.0613             | -0.0108            | 0.1815            | -0.2248              | -0.0024           | 0.0969            | -0.2840               |
| Foc-Quad1[V]          | -0.0074           | 0.1053   | 0.2433             | 1                | -0.1896          | -0.1215             | 0.9951              | 0.1006             | 0.0582            | -0.0839              | -0.0585           | -0.2880           | -0.0093               |
| Rot-Quad2[V]          | -0.0325           | -0.4561  | 0.3953             | -0.1896          | 1                | -0.4058             | -0.1865             | 0.3472             | 0.3582            | -0.3408              | 0.2080            | 0.0434            | -0.1782               |
| Source Offset[V]      | -0.0146           | 0.0747   | -0.2027            | -0.1215          | -0.4058          | 1                   | -0.1167             | -0.1327            | -0.3813           | 0.2202               | 0.2038            | -0.0676           | 0.3309                |
| Matsuda Plate[V]      | -0.0045           | 0.1222   | 0.2858             | 0.9951           | -0.1865          | -0.1167             | 1                   | 0.0822             | 0.0579            | -0.0629              | -0.0667           | -0.2836           | 0.0006                |
| Cool Gas[l/min]       | -0.0500           | -0.5477  | 0.2684             | 0.1006           | 0.3472           | -0.1327             | 0.0822              | 1                  | 0.1551            | -0.2227              | 0.0966            | -0.1228           | 0.1428                |
| Aux Gas[l/min]        | -0.0111           | -0.1774  | 0.2840             | 0.0582           | 0.3582           | -0.3813             | 0.0579              | 0.1551             | 1                 | -0.1019              | 0.0109            | -0.0317           | -0.1837               |
| Sample Gas[l/min]     | 0.0108            | 0.1988   | 0.0172             | -0.0839          | -0.3408          | 0.2202              | -0.0629             | -0.2227            | -0.1019           | 1                    | -0.2240           | -0.4676           | 0.3691                |
| Add Gas[l/min]        | -0.0135           | -0.1208  | -0.0394            | -0.0585          | 0.2080           | 0.2038              | -0.0667             | 0.0966             | 0.0109            | -0.2240              | 1                 | -0.1501           | 0.0139                |
| Org Gas[l/min]        | 0.0243            | 0.1411   | -0.2242            | -0.2880          | 0.0434           | -0.0676             | -0.2836             | -0.1228            | -0.0317           | -0.4676              | -0.1501           | 1                 | -0.1564               |
| Operation Power[W]    | -0.0066           | -0.0338  | 0.0329             | -0.0093          | -0.1782          | 0.3309              | 0.0006              | 0.1428             | -0.1837           | 0.3691               | 0.0139            | -0.1564           | 1                     |
| X-Pos[mm]             | 0.0304            | 0.1592   | -0.1700            | -0.1114          | -0.1561          | 0.0960              | -0.1013             | -0.1742            | -0.1993           | 0.1820               | -0.0312           | 0.1559            | 0.0287                |
| Y-Pos[mm]             | 0.0354            | 0.2843   | -0.2456            | -0.1021          | -0.3149          | 0.1418              | -0.0904             | -0.2949            | -0.2509           | 0.2315               | -0.0840           | 0.1622            | 0.0033                |
| Z-Pos[mm]             | 0.0297            | 0.1893   | -0.1584            | -0.1164          | -0.1952          | 0.1158              | -0.1040             | -0.2043            | -0.1615           | 0.1986               | -0.0614           | 0.1587            | 0.0257                |
| Ampl.-Temp[°C]        | 0.0132            | 0.1586   | -0.0982            | -0.0489          | -0.1994          | -0.0078             | -0.0453             | -0.2484            | -0.0800           | 0.4015               | -0.0735           | -0.2838           | -0.0234               |
| Fore Vacuum[mbar]     | -0.0274           | -0.5500  | 0.1717             | -0.1255          | 0.4320           | -0.2071             | -0.1520             | 0.5655             | 0.1103            | -0.2214              | 0.0340            | 0.0884            | 0.0625                |
| High Vacuum[mbar]     | -0.0156           | 0.0645   | 0.3107             | 0.6126           | -0.0464          | -0.0925             | 0.6161              | 0.0744             | 0.2710            | 0.1221               | -0.1106           | -0.2443           | -0.1088               |
| IonGetter-Press[mbar] | -0.0097           | -0.1126  | 0.1527             | -0.1514          | 0.2601           | -0.2499             | -0.1442             | 0.0632             | -0.0345           | 0.2509               | -0.0807           | -0.1585           | -0.1417               |
| <sup>198</sup> Hg     | -0.0195           | -0.1718  | -0.1103            | -0.0209          | 0.0428           | -0.0104             | -0.0395             | 0.1063             | -0.0949           | -0.2538              | 0.0133            | 0.0516            | -0.1158               |
| <sup>199</sup> Hg     | -0.0196           | -0.1721  | -0.1096            | -0.0210          | 0.0431           | -0.0097             | -0.0397             | 0.1074             | -0.0947           | -0.2546              | 0.0140            | 0.0515            | -0.1155               |
| <sup>200</sup> Hg     | -0.0196           | -0.1734  | -0.1097            | -0.0211          | 0.0443           | -0.0095             | -0.0398             | 0.1082             | -0.0944           | -0.2558              | 0.0149            | 0.0521            | -0.1148               |
| <sup>201</sup> Hg     | -0.0198           | -0.1737  | -0.1092            | -0.0210          | 0.0444           | -0.0096             | -0.0398             | 0.1100             | -0.0941           | -0.2556              | 0.0154            | 0.0502            | -0.1143               |
| <sup>202</sup> Hg     | -0.0198           | -0.1741  | -0.1090            | -0.0211          | 0.0444           | -0.0099             | -0.0398             | 0.1108             | -0.0939           | -0.2570              | 0.0163            | 0.0510            | -0.1138               |

|                                                  |         |         |         |         |         |         |         |         |         |         |         |         |         |
|--------------------------------------------------|---------|---------|---------|---------|---------|---------|---------|---------|---------|---------|---------|---------|---------|
| <sup>203</sup> Tl                                | 0.0214  | 0.2381  | -0.1126 | 0.2761  | -0.2711 | -0.1423 | 0.2761  | -0.1416 | 0.0255  | -0.0931 | -0.1193 | 0.0614  | -0.0748 |
| <sup>205</sup> Tl                                | 0.0233  | 0.2361  | -0.1121 | 0.2764  | -0.2686 | -0.1439 | 0.2763  | -0.1399 | 0.0264  | -0.0959 | -0.1186 | 0.0620  | -0.0753 |
| <sup>202</sup> Hg/ <sup>198</sup> Hg             | -0.0220 | -0.2900 | 0.0789  | 0.0402  | 0.1337  | 0.0111  | 0.0260  | 0.2505  | -0.0551 | 0.0070  | -0.0034 | -0.1658 | -0.0783 |
| <sup>201</sup> Hg/ <sup>198</sup> Hg             | -0.0109 | -0.1654 | 0.0402  | 0.2295  | 0.0024  | -0.0057 | 0.2105  | 0.1416  | -0.1118 | -0.0290 | -0.0254 | -0.1676 | -0.1167 |
| <sup>200</sup> Hg/ <sup>198</sup> Hg             | -0.0058 | -0.2567 | -0.0180 | -0.1916 | 0.1384  | 0.0551  | -0.2005 | 0.1621  | -0.0604 | 0.0713  | 0.0256  | 0.0272  | -0.0709 |
| <sup>199</sup> Hg/ <sup>198</sup> Hg             | 0.0085  | -0.0759 | -0.0382 | -0.0575 | 0.0010  | 0.0364  | -0.0573 | 0.0103  | -0.1224 | 0.0412  | -0.0309 | 0.0623  | -0.0728 |
| <sup>205</sup> Tl/ <sup>203</sup> Tl             | -0.0361 | -0.3509 | 0.1901  | 0.0955  | 0.3210  | -0.1399 | 0.0884  | 0.4214  | 0.0635  | -0.3313 | 0.1680  | 0.0199  | 0.1682  |
| <sup>202</sup> Hg/ <sup>198</sup> Hg(*)          | -0.0334 | -0.4043 | 0.1789  | 0.0871  | 0.3439  | -0.0731 | 0.0769  | 0.4542  | 0.0506  | -0.3844 | 0.2606  | -0.0019 | 0.1404  |
| <sup>201</sup> Hg/ <sup>198</sup> Hg(*)          | -0.0350 | -0.4416 | 0.1986  | 0.1498  | 0.3446  | -0.0774 | 0.1388  | 0.4799  | 0.0320  | -0.3839 | 0.2507  | -0.0397 | 0.1335  |
| <sup>200</sup> Hg/ <sup>198</sup> Hg(*)          | -0.0330 | -0.4066 | 0.1580  | 0.0451  | 0.3016  | -0.0927 | 0.0335  | 0.4735  | 0.0404  | -0.3530 | 0.2063  | -0.0038 | 0.1604  |
| <sup>199</sup> Hg/ <sup>198</sup> Hg(*)          | -0.0317 | -0.3804 | 0.1756  | 0.1172  | 0.3046  | -0.1070 | 0.1089  | 0.4379  | 0.0279  | -0.3622 | 0.2068  | 0.0302  | 0.1456  |
| StdErr(abs) <sup>198</sup> Hg                    | 0.0064  | -0.0018 | -0.1134 | -0.0171 | -0.0200 | 0.0039  | -0.0272 | 0.0406  | -0.0655 | -0.2029 | -0.0296 | 0.1917  | -0.0294 |
| StdErr(abs) <sup>199</sup> Hg                    | 0.0063  | -0.0014 | -0.1133 | -0.0170 | -0.0199 | 0.0043  | -0.0271 | 0.0405  | -0.0650 | -0.2031 | -0.0293 | 0.1918  | -0.0303 |
| StdErr(abs) <sup>200</sup> Hg                    | 0.0061  | -0.0024 | -0.1126 | -0.0173 | -0.0182 | 0.0025  | -0.0275 | 0.0405  | -0.0634 | -0.2045 | -0.0290 | 0.1924  | -0.0321 |
| StdErr(abs) <sup>201</sup> Hg                    | 0.0060  | -0.0028 | -0.1140 | -0.0173 | -0.0187 | 0.0031  | -0.0275 | 0.0415  | -0.0630 | -0.2053 | -0.0286 | 0.1929  | -0.0312 |
| StdErr(abs) <sup>202</sup> Hg                    | 0.0080  | -0.0027 | -0.1139 | -0.0183 | -0.0180 | 0.0031  | -0.0285 | 0.0413  | -0.0634 | -0.2057 | -0.0282 | 0.1926  | -0.0314 |
| StdErr(abs) <sup>203</sup> Tl                    | -0.0119 | -0.0032 | -0.0571 | -0.0132 | -0.0678 | -0.1206 | -0.0239 | 0.0325  | 0.1619  | -0.1483 | -0.0803 | 0.0406  | -0.2032 |
| StdErr(abs) <sup>205</sup> Tl                    | -0.0121 | -0.0028 | -0.0566 | -0.0121 | -0.0659 | -0.1225 | -0.0229 | 0.0348  | 0.1620  | -0.1499 | -0.0804 | 0.0424  | -0.2048 |
| StdErr(abs) <sup>202</sup> Hg/ <sup>198</sup> Hg | 0.0179  | -0.0173 | 0.0338  | 0.1328  | 0.0248  | -0.0152 | 0.1365  | 0.0060  | 0.1086  | 0.0290  | 0.0680  | -0.0873 | -0.0641 |
| StdErr(abs) <sup>201</sup> Hg/ <sup>198</sup> Hg | 0.0133  | 0.0028  | 0.0368  | 0.1365  | 0.0180  | -0.0407 | 0.1423  | -0.0143 | 0.1263  | 0.0278  | 0.0530  | -0.0604 | -0.0590 |
| StdErr(abs) <sup>200</sup> Hg/ <sup>198</sup> Hg | 0.0212  | 0.0286  | 0.0339  | 0.1413  | 0.0008  | -0.0466 | 0.1487  | -0.0337 | 0.1168  | 0.0379  | 0.0468  | -0.0540 | -0.0547 |
| StdErr(abs) <sup>199</sup> Hg/ <sup>198</sup> Hg | 0.0228  | 0.0487  | 0.0298  | 0.1405  | -0.0264 | -0.0436 | 0.1483  | -0.0429 | 0.1427  | 0.0314  | 0.0396  | -0.0351 | -0.0526 |
| StdErr(abs) <sup>205</sup> Tl/ <sup>203</sup> Tl | -0.0206 | -0.1323 | 0.0461  | 0.1400  | -0.0512 | 0.0225  | 0.1360  | 0.0681  | -0.0097 | -0.0438 | -0.0251 | -0.0815 | -0.0360 |
| StdErr(abs) <sup>202</sup> Hg/ <sup>198</sup> Hg |         |         |         |         |         |         |         |         |         |         |         |         |         |
| (*)                                              | 0.0095  | 0.0075  | -0.0187 | -0.0020 | -0.0589 | 0.0360  | 0.0002  | -0.0186 | 0.0394  | 0.0875  | -0.0151 | 0.0351  | 0.0245  |
| R-THg(%)                                         | -0.0016 | 0.0167  | -0.0005 | 0.0053  | -0.0211 | 0.0226  | 0.0069  | -0.0135 | -0.0056 | -0.0012 | 0.0029  | 0.0017  | 0.0204  |
| d199(‰)                                          | -0.0057 | 0.0244  | -0.0491 | 0.0175  | -0.0486 | 0.0146  | 0.0159  | -0.0180 | -0.0229 | 0.0170  | -0.0115 | 0.0195  | 0.0063  |
| d200(‰)                                          | -0.0088 | 0.0082  | -0.0256 | 0.0185  | -0.0246 | 0.0174  | 0.0167  | 0.0001  | -0.0149 | -0.0020 | -0.0105 | 0.0121  | 0.0092  |
| d201(‰)                                          | -0.0058 | 0.0077  | -0.0148 | 0.0196  | -0.0100 | 0.0114  | 0.0186  | 0.0027  | -0.0030 | -0.0069 | -0.0039 | 0.0080  | 0.0015  |
| d202(‰)                                          | -0.0010 | 0.0584  | -0.0649 | 0.0453  | -0.1145 | 0.0564  | 0.0450  | -0.0393 | -0.0608 | 0.0602  | -0.0210 | 0.0138  | 0.0289  |

---

|         |         |         |         |        |         |         |        |        |         |         |         |         |         |
|---------|---------|---------|---------|--------|---------|---------|--------|--------|---------|---------|---------|---------|---------|
| D199(‰) | -0.0121 | -0.0095 | 0.0074  | 0.0007 | 0.0211  | -0.0073 | 0.0007 | 0.0137 | 0.0202  | -0.0057 | 0.0013  | 0.0023  | -0.0065 |
| D200(‰) | -0.0113 | -0.0130 | 0.0233  | 0.0068 | 0.0255  | -0.0137 | 0.0069 | 0.0152 | 0.0144  | -0.0111 | -0.0042 | -0.0041 | -0.0130 |
| D201(‰) | 0.0078  | -0.0038 | -0.0021 | 0.0081 | -0.0033 | -0.0020 | 0.0072 | 0.0021 | -0.0077 | -0.0048 | -0.0142 | 0.0125  | -0.0133 |

---

|                       | X-Pos[<br>mm] | Y-Pos[<br>mm] | Z-Pos[<br>mm] | Ampl.-T<br>emp[°C] | Fore<br>Vacuum[mbar] | High<br>Vacuum[mbar] | IonGetter-Press<br>[mbar] | <sup>198</sup> Hg | <sup>199</sup> Hg | <sup>200</sup> Hg | <sup>201</sup> Hg | <sup>202</sup> Hg | <sup>203</sup> Tl |
|-----------------------|---------------|---------------|---------------|--------------------|----------------------|----------------------|---------------------------|-------------------|-------------------|-------------------|-------------------|-------------------|-------------------|
| Extraction[V]         | 0.0304        | 0.0354        | 0.0297        | 0.0132             | -0.0274              | -0.0156              | -0.0097                   | -0.0195           | -0.0196           | -0.0196           | -0.0198           | -0.0198           | 0.0214            |
| Focus[V]              | 0.1592        | 0.2843        | 0.1893        | 0.1586             | -0.5500              | 0.0645               | -0.1126                   | -0.1718           | -0.1721           | -0.1734           | -0.1737           | -0.1741           | 0.2381            |
| Source Quad1[V]       | -0.1700       | -0.2456       | -0.1584       | -0.0982            | 0.1717               | 0.3107               | 0.1527                    | -0.1103           | -0.1096           | -0.1097           | -0.1092           | -0.1090           | -0.1126           |
| Rot-Quad1[V]          | -0.0587       | -0.0788       | -0.0735       | 0.0280             | 0.1032               | 0.0010               | 0.0635                    | 0.0740            | 0.0738            | 0.0738            | 0.0734            | 0.0734            | -0.0277           |
| Foc-Quad1[V]          | -0.1114       | -0.1021       | -0.1164       | -0.0489            | -0.1255              | 0.6126               | -0.1514                   | -0.0209           | -0.0210           | -0.0211           | -0.0210           | -0.0211           | 0.2761            |
| Rot-Quad2[V]          | -0.1561       | -0.3149       | -0.1952       | -0.1994            | 0.4320               | -0.0464              | 0.2601                    | 0.0428            | 0.0431            | 0.0443            | 0.0444            | 0.0444            | -0.2711           |
| Source Offset[V]      | 0.0960        | 0.1418        | 0.1158        | -0.0078            | -0.2071              | -0.0925              | -0.2499                   | -0.0104           | -0.0097           | -0.0095           | -0.0096           | -0.0099           | -0.1423           |
| Matsuda Plate[V]      | -0.1013       | -0.0904       | -0.1040       | -0.0453            | -0.1520              | 0.6161               | -0.1442                   | -0.0395           | -0.0397           | -0.0398           | -0.0398           | -0.0398           | 0.2761            |
| Cool Gas[l/min]       | -0.1742       | -0.2949       | -0.2043       | -0.2484            | 0.5655               | 0.0744               | 0.0632                    | 0.1063            | 0.1074            | 0.1082            | 0.1100            | 0.1108            | -0.1416           |
| Aux Gas[l/min]        | -0.1993       | -0.2509       | -0.1615       | -0.0800            | 0.1103               | 0.2710               | -0.0345                   | -0.0949           | -0.0947           | -0.0944           | -0.0941           | -0.0939           | 0.0255            |
| Sample Gas[l/min]     | 0.1820        | 0.2315        | 0.1986        | 0.4015             | -0.2214              | 0.1221               | 0.2509                    | -0.2538           | -0.2546           | -0.2558           | -0.2556           | -0.2570           | -0.0931           |
| Add Gas[l/min]        | -0.0312       | -0.0840       | -0.0614       | -0.0735            | 0.0340               | -0.1106              | -0.0807                   | 0.0133            | 0.0140            | 0.0149            | 0.0154            | 0.0163            | -0.1193           |
| Org Gas[l/min]        | 0.1559        | 0.1622        | 0.1587        | -0.2838            | 0.0884               | -0.2443              | -0.1585                   | 0.0516            | 0.0515            | 0.0521            | 0.0502            | 0.0510            | 0.0614            |
| Operation Power[W]    | 0.0287        | 0.0033        | 0.0257        | -0.0234            | 0.0625               | -0.1088              | -0.1417                   | -0.1158           | -0.1155           | -0.1148           | -0.1143           | -0.1138           | -0.0748           |
| X-Pos[mm]             | 1             | 0.9670        | 0.9733        | 0.0940             | 0.0155               | 0.1000               | 0.0299                    | -0.2237           | -0.2241           | -0.2247           | -0.2252           | -0.2260           | -0.0548           |
| Y-Pos[mm]             | 0.9670        | 1             | 0.9717        | 0.1558             | -0.1331              | 0.0896               | -0.0208                   | -0.2286           | -0.2293           | -0.2301           | -0.2307           | -0.2315           | 0.0167            |
| Z-Pos[mm]             | 0.9733        | 0.9717        | 1             | 0.1092             | -0.0494              | 0.1124               | -0.0307                   | -0.2346           | -0.2349           | -0.2354           | -0.2358           | -0.2366           | -0.0331           |
| Ampl.-Temp[°C]        | 0.0940        | 0.1558        | 0.1092        | 1                  | -0.3360              | 0.1293               | 0.1946                    | -0.1614           | -0.1623           | -0.1629           | -0.1642           | -0.1653           | -0.0114           |
| Fore Vacuum[mbar]     | 0.0155        | -0.1331       | -0.0494       | -0.3360            | 1                    | 0.0537               | 0.1294                    | 0.0733            | 0.0737            | 0.0745            | 0.0751            | 0.0756            | -0.3387           |
| High Vacuum[mbar]     | 0.1000        | 0.0896        | 0.1124        | 0.1293             | 0.0537               | 1                    | -0.1211                   | -0.1643           | -0.1651           | -0.1660           | -0.1667           | -0.1675           | 0.1245            |
| IonGetter-Press[mbar] | 0.0299        | -0.0208       | -0.0307       | 0.1946             | 0.1294               | -0.1211              | 1                         | -0.0765           | -0.0773           | -0.0772           | -0.0780           | -0.0784           | -0.1311           |
| <sup>198</sup> Hg     | -0.2237       | -0.2286       | -0.2346       | -0.1614            | 0.0733               | -0.1643              | -0.0765                   | 1                 | 0.9983            | 0.9983            | 0.9959            | 0.9942            | 0.0699            |
| <sup>199</sup> Hg     | -0.2241       | -0.2293       | -0.2349       | -0.1623            | 0.0737               | -0.1651              | -0.0773                   | 0.9983            | 1                 | 0.9986            | 0.9976            | 0.9959            | 0.0698            |
| <sup>200</sup> Hg     | -0.2247       | -0.2301       | -0.2354       | -0.1629            | 0.0745               | -0.1660              | -0.0772                   | 0.9983            | 0.9986            | 1                 | 0.9976            | 0.9959            | 0.0699            |
| <sup>201</sup> Hg     | -0.2252       | -0.2307       | -0.2358       | -0.1642            | 0.0751               | -0.1667              | -0.0780                   | 0.9959            | 0.9976            | 0.9976            | 1                 | 0.9983            | 0.0691            |
| <sup>202</sup> Hg     | -0.2260       | -0.2315       | -0.2366       | -0.1653            | 0.0756               | -0.1675              | -0.0784                   | 0.9942            | 0.9959            | 0.9959            | 0.9983            | 1                 | 0.0694            |
| <sup>203</sup> Tl     | -0.0548       | 0.0167        | -0.0331       | -0.0114            | -0.3387              | 0.1245               | -0.1311                   | 0.0699            | 0.0698            | 0.0699            | 0.0691            | 0.0694            | 1                 |
| <sup>205</sup> Tl     | -0.0563       | 0.0148        | -0.0347       | -0.0132            | -0.3373              | 0.1230               | -0.1312                   | 0.0706            | 0.0705            | 0.0706            | 0.0699            | 0.0702            | 0.9994            |

|                                                 |         |         |         |         |         |         |         |         |         |         |         |         |         |
|-------------------------------------------------|---------|---------|---------|---------|---------|---------|---------|---------|---------|---------|---------|---------|---------|
| $^{202}\text{Hg}/^{198}\text{Hg}$               | -0.0097 | -0.0761 | -0.0255 | -0.0791 | 0.3946  | 0.1367  | 0.0958  | 0.1530  | 0.1530  | 0.1525  | 0.1533  | 0.1530  | -0.1718 |
| $^{201}\text{Hg}/^{198}\text{Hg}$               | 0.1236  | 0.0700  | 0.0959  | -0.0626 | 0.4039  | 0.3431  | -0.0111 | 0.1497  | 0.1501  | 0.1490  | 0.1506  | 0.1500  | -0.1009 |
| $^{200}\text{Hg}/^{198}\text{Hg}$               | 0.2103  | 0.1442  | 0.1884  | -0.0620 | 0.4425  | 0.0746  | 0.1240  | 0.1002  | 0.0999  | 0.0998  | 0.0999  | 0.0995  | -0.2016 |
| $^{199}\text{Hg}/^{198}\text{Hg}$               | 0.2383  | 0.1957  | 0.2291  | -0.0415 | 0.2512  | 0.1820  | 0.0333  | 0.0682  | 0.0686  | 0.0677  | 0.0694  | 0.0688  | -0.1294 |
| $^{205}\text{Tl}/^{203}\text{Tl}$               | -0.3086 | -0.3833 | -0.3408 | -0.3872 | 0.3148  | -0.2941 | 0.0398  | 0.0983  | 0.1003  | 0.1020  | 0.1032  | 0.1049  | -0.0792 |
| $^{202}\text{Hg}/^{198}\text{Hg}^*$             | -0.3111 | -0.3988 | -0.3448 | -0.4347 | 0.3544  | -0.3084 | -0.0005 | 0.1360  | 0.1384  | 0.1402  | 0.1418  | 0.1439  | -0.1367 |
| $^{201}\text{Hg}/^{198}\text{Hg}^*$             | -0.2815 | -0.3732 | -0.3165 | -0.4435 | 0.3991  | -0.2305 | -0.0318 | 0.1435  | 0.1460  | 0.1478  | 0.1495  | 0.1516  | -0.1315 |
| $^{200}\text{Hg}/^{198}\text{Hg}^*$             | -0.2962 | -0.3804 | -0.3309 | -0.3621 | 0.3723  | -0.3078 | 0.0418  | 0.1186  | 0.1211  | 0.1224  | 0.1247  | 0.1264  | -0.1390 |
| $^{199}\text{Hg}/^{198}\text{Hg}^*$             | -0.2626 | -0.3446 | -0.2960 | -0.4139 | 0.3657  | -0.2484 | 0.0195  | 0.1128  | 0.1152  | 0.1166  | 0.1183  | 0.1200  | -0.1005 |
| StdErr(abs) $^{198}\text{Hg}$                   | -0.0583 | -0.0550 | -0.0710 | -0.0844 | 0.0427  | -0.0725 | -0.0970 | 0.4072  | 0.4063  | 0.4068  | 0.4056  | 0.4060  | 0.0316  |
| StdErr(abs) $^{199}\text{Hg}$                   | -0.0585 | -0.0551 | -0.0712 | -0.0850 | 0.0424  | -0.0731 | -0.0966 | 0.4080  | 0.4071  | 0.4076  | 0.4065  | 0.4068  | 0.0317  |
| StdErr(abs) $^{200}\text{Hg}$                   | -0.0597 | -0.0563 | -0.0723 | -0.0853 | 0.0427  | -0.0744 | -0.0959 | 0.4084  | 0.4076  | 0.4081  | 0.4069  | 0.4072  | 0.0321  |
| StdErr(abs) $^{201}\text{Hg}$                   | -0.0605 | -0.0572 | -0.0731 | -0.0871 | 0.0429  | -0.0767 | -0.0964 | 0.4095  | 0.4086  | 0.4091  | 0.4080  | 0.4083  | 0.0320  |
| StdErr(abs) $^{202}\text{Hg}$                   | -0.0608 | -0.0577 | -0.0735 | -0.0877 | 0.0432  | -0.0775 | -0.0959 | 0.4107  | 0.4099  | 0.4103  | 0.4092  | 0.4095  | 0.0321  |
| StdErr(abs) $^{203}\text{Tl}$                   | -0.1850 | -0.1507 | -0.1709 | 0.0482  | -0.1010 | -0.0203 | -0.0265 | 0.1083  | 0.1083  | 0.1088  | 0.1088  | 0.1093  | 0.4014  |
| StdErr(abs) $^{205}\text{Tl}$                   | -0.1854 | -0.1513 | -0.1711 | 0.0474  | -0.0989 | -0.0185 | -0.0261 | 0.1092  | 0.1092  | 0.1096  | 0.1096  | 0.1101  | 0.4004  |
| StdErr(abs) $^{202}\text{Hg}/^{198}\text{Hg}$   | 0.0637  | 0.0502  | 0.0501  | 0.0646  | -0.0695 | 0.0781  | 0.0384  | -0.3859 | -0.3856 | -0.3852 | -0.3845 | -0.3841 | -0.0450 |
| StdErr(abs) $^{201}\text{Hg}/^{198}\text{Hg}$   | 0.0903  | 0.0804  | 0.0793  | 0.0585  | -0.0901 | 0.0849  | 0.0332  | -0.4436 | -0.4438 | -0.4430 | -0.4428 | -0.4422 | 0.0107  |
| StdErr(abs) $^{200}\text{Hg}/^{198}\text{Hg}$   | 0.0901  | 0.0854  | 0.0810  | 0.0725  | -0.1142 | 0.0819  | 0.0391  | -0.4763 | -0.4761 | -0.4753 | -0.4754 | -0.4748 | 0.0547  |
| StdErr(abs) $^{199}\text{Hg}/^{198}\text{Hg}$   | 0.1049  | 0.1041  | 0.0981  | 0.0679  | -0.1190 | 0.0989  | 0.0257  | -0.5182 | -0.5183 | -0.5176 | -0.5178 | -0.5171 | 0.0673  |
| StdErr(abs) $^{205}\text{Tl}/^{203}\text{Tl}$   | -0.0503 | -0.0535 | -0.0797 | 0.0494  | 0.0538  | 0.1237  | 0.0600  | 0.0154  | 0.0149  | 0.0154  | 0.0146  | 0.0149  | -0.0781 |
| StdErr(abs) $^{202}\text{Hg}/^{198}\text{Hg}^*$ | 0.0907  | 0.0924  | 0.0785  | 0.1601  | -0.0401 | 0.0057  | 0.0002  | -0.2213 | -0.2225 | -0.2213 | -0.2228 | -0.2229 | 0.0253  |
| R-THg(%)                                        | 0.0010  | 0.0070  | 0.0045  | 0.0036  | -0.0274 | -0.0066 | -0.0305 | 0.0452  | 0.0449  | 0.0448  | 0.0438  | 0.0439  | 0.0204  |
| d199(‰)                                         | 0.0317  | 0.0386  | 0.0290  | 0.0308  | -0.0062 | 0.0272  | -0.0224 | 0.0155  | 0.0152  | 0.0146  | 0.0143  | 0.0148  | 0.0431  |
| d200(‰)                                         | 0.0220  | 0.0238  | 0.0189  | 0.0096  | 0.0087  | 0.0213  | -0.0256 | 0.0340  | 0.0330  | 0.0327  | 0.0319  | 0.0322  | 0.0193  |
| d201(‰)                                         | 0.0086  | 0.0085  | 0.0073  | 0.0084  | 0.0075  | 0.0287  | -0.0250 | 0.0174  | 0.0172  | 0.0172  | 0.0168  | 0.0174  | 0.0104  |
| d202(‰)                                         | 0.0593  | 0.0733  | 0.0556  | 0.0589  | -0.0388 | 0.0481  | -0.0310 | 0.0408  | 0.0400  | 0.0399  | 0.0387  | 0.0391  | 0.0832  |
| D199(‰)                                         | -0.0022 | -0.0052 | -0.0015 | -0.0135 | 0.0182  | 0.0122  | -0.0012 | -0.0054 | -0.0049 | -0.0056 | -0.0047 | -0.0047 | -0.0031 |
| D200(‰)                                         | -0.0017 | -0.0061 | -0.0020 | -0.0080 | 0.0181  | 0.0190  | 0.0036  | -0.0171 | -0.0171 | -0.0181 | -0.0164 | -0.0165 | -0.0103 |
| D201(‰)                                         | 0.0144  | 0.0140  | 0.0105  | 0.0067  | 0.0104  | 0.0172  | -0.0039 | -0.0141 | -0.0138 | -0.0146 | -0.0128 | -0.0127 | 0.0072  |

|                       | <sup>205</sup> Tl | <sup>202</sup> Hg/ <sup>198</sup> Hg | <sup>201</sup> Hg/ <sup>198</sup> Hg | <sup>200</sup> Hg/ <sup>198</sup> Hg | <sup>199</sup> Hg/ <sup>198</sup> Hg | <sup>205</sup> Tl/ <sup>203</sup> Tl | <sup>202</sup> Hg/ <sup>198</sup> Hg | <sup>201</sup> Hg/ <sup>198</sup> Hg | <sup>200</sup> Hg/ <sup>198</sup> Hg | <sup>199</sup> Hg/ <sup>198</sup> Hg | StdErr(abs)       | StdErr(abs)       | StdErr(abs)       |
|-----------------------|-------------------|--------------------------------------|--------------------------------------|--------------------------------------|--------------------------------------|--------------------------------------|--------------------------------------|--------------------------------------|--------------------------------------|--------------------------------------|-------------------|-------------------|-------------------|
|                       |                   | Hg                                   | Hg                                   | Hg                                   | Hg                                   | Tl                                   | (*)                                  | (*)                                  | (*)                                  | (*)                                  | <sup>198</sup> Hg | <sup>199</sup> Hg | <sup>200</sup> Hg |
| Extraction[V]         | 0.0233            | -0.0220                              | -0.0109                              | -0.0058                              | 0.0085                               | -0.0361                              | -0.0334                              | -0.0350                              | -0.0330                              | -0.0317                              | 0.0064            | 0.0063            | 0.0061            |
| Focus[V]              | 0.2361            | -0.2900                              | -0.1654                              | -0.2567                              | -0.0759                              | -0.3509                              | -0.4043                              | -0.4416                              | -0.4066                              | -0.3804                              | -0.0018           | -0.0014           | -0.0024           |
| Source Quad1[V]       | -0.1121           | 0.0789                               | 0.0402                               | -0.0180                              | -0.0382                              | 0.1901                               | 0.1789                               | 0.1986                               | 0.1580                               | 0.1756                               | -0.1134           | -0.1133           | -0.1126           |
| Rot-Quad1[V]          | -0.0277           | 0.0148                               | -0.0243                              | 0.0122                               | 0.0221                               | 0.0180                               | 0.0114                               | 0.0079                               | 0.0097                               | 0.0113                               | 0.0095            | 0.0082            | 0.0113            |
| Foc-Quad1[V]          | 0.2764            | 0.0402                               | 0.2295                               | -0.1916                              | -0.0575                              | 0.0955                               | 0.0871                               | 0.1498                               | 0.0451                               | 0.1172                               | -0.0171           | -0.0170           | -0.0173           |
| Rot-Quad2[V]          | -0.2686           | 0.1337                               | 0.0024                               | 0.1384                               | 0.0010                               | 0.3210                               | 0.3439                               | 0.3446                               | 0.3016                               | 0.3046                               | -0.0200           | -0.0199           | -0.0182           |
| Source Offset[V]      | -0.1439           | 0.0111                               | -0.0057                              | 0.0551                               | 0.0364                               | -0.1399                              | -0.0731                              | -0.0774                              | -0.0927                              | -0.1070                              | 0.0039            | 0.0043            | 0.0025            |
| Matsuda Plate[V]      | 0.2763            | 0.0260                               | 0.2105                               | -0.2005                              | -0.0573                              | 0.0884                               | 0.0769                               | 0.1388                               | 0.0335                               | 0.1089                               | -0.0272           | -0.0271           | -0.0275           |
| Cool Gas[l/min]       | -0.1399           | 0.2505                               | 0.1416                               | 0.1621                               | 0.0103                               | 0.4214                               | 0.4542                               | 0.4799                               | 0.4735                               | 0.4379                               | 0.0406            | 0.0405            | 0.0405            |
| Aux Gas[l/min]        | 0.0264            | -0.0551                              | -0.1118                              | -0.0604                              | -0.1224                              | 0.0635                               | 0.0506                               | 0.0320                               | 0.0404                               | 0.0279                               | -0.0655           | -0.0650           | -0.0634           |
| Sample Gas[l/min]     | -0.0959           | 0.0070                               | -0.0290                              | 0.0713                               | 0.0412                               | -0.3313                              | -0.3844                              | -0.3839                              | -0.3530                              | -0.3622                              | -0.2029           | -0.2031           | -0.2045           |
| Add Gas[l/min]        | -0.1186           | -0.0034                              | -0.0254                              | 0.0256                               | -0.0309                              | 0.1680                               | 0.2606                               | 0.2507                               | 0.2063                               | 0.2068                               | -0.0296           | -0.0293           | -0.0290           |
| Org Gas[l/min]        | 0.0620            | -0.1658                              | -0.1676                              | 0.0272                               | 0.0623                               | 0.0199                               | -0.0019                              | -0.0397                              | -0.0038                              | 0.0302                               | 0.1917            | 0.1918            | 0.1924            |
| Operation Power[W]    | -0.0753           | -0.0783                              | -0.1167                              | -0.0709                              | -0.0728                              | 0.1682                               | 0.1404                               | 0.1335                               | 0.1604                               | 0.1456                               | -0.0294           | -0.0303           | -0.0321           |
| X-Pos[mm]             | -0.0563           | -0.0097                              | 0.1236                               | 0.2103                               | 0.2383                               | -0.3086                              | -0.3111                              | -0.2815                              | -0.2962                              | -0.2626                              | -0.0583           | -0.0585           | -0.0597           |
| Y-Pos[mm]             | 0.0148            | -0.0761                              | 0.0700                               | 0.1442                               | 0.1957                               | -0.3833                              | -0.3988                              | -0.3732                              | -0.3804                              | -0.3446                              | -0.0550           | -0.0551           | -0.0563           |
| Z-Pos[mm]             | -0.0347           | -0.0255                              | 0.0959                               | 0.1884                               | 0.2291                               | -0.3408                              | -0.3448                              | -0.3165                              | -0.3309                              | -0.2960                              | -0.0710           | -0.0712           | -0.0723           |
| Ampl.-Temp[°C]        | -0.0132           | -0.0791                              | -0.0626                              | -0.0620                              | -0.0415                              | -0.3872                              | -0.4347                              | -0.4435                              | -0.3621                              | -0.4139                              | -0.0844           | -0.0850           | -0.0853           |
| Fore Vacuum[mbar]     | -0.3373           | 0.3946                               | 0.4039                               | 0.4425                               | 0.2512                               | 0.3148                               | 0.3544                               | 0.3991                               | 0.3723                               | 0.3657                               | 0.0427            | 0.0424            | 0.0427            |
| High Vacuum[mbar]     | 0.1230            | 0.1367                               | 0.3431                               | 0.0746                               | 0.1820                               | -0.2941                              | -0.3084                              | -0.2305                              | -0.3078                              | -0.2484                              | -0.0725           | -0.0731           | -0.0744           |
| IonGetter-Press[mbar] | -0.1312           | 0.0958                               | -0.0111                              | 0.1240                               | 0.0333                               | 0.0398                               | -0.0005                              | -0.0318                              | 0.0418                               | 0.0195                               | -0.0970           | -0.0966           | -0.0959           |
| <sup>198</sup> Hg     | 0.0706            | 0.1530                               | 0.1497                               | 0.1002                               | 0.0682                               | 0.0983                               | 0.1360                               | 0.1435                               | 0.1186                               | 0.1128                               | 0.4072            | 0.4080            | 0.4084            |
| <sup>199</sup> Hg     | 0.0705            | 0.1530                               | 0.1501                               | 0.0999                               | 0.0686                               | 0.1003                               | 0.1384                               | 0.1460                               | 0.1211                               | 0.1152                               | 0.4063            | 0.4071            | 0.4076            |
| <sup>200</sup> Hg     | 0.0706            | 0.1525                               | 0.1490                               | 0.0998                               | 0.0677                               | 0.1020                               | 0.1402                               | 0.1478                               | 0.1224                               | 0.1166                               | 0.4068            | 0.4076            | 0.4081            |
| <sup>201</sup> Hg     | 0.0699            | 0.1533                               | 0.1506                               | 0.0999                               | 0.0694                               | 0.1032                               | 0.1418                               | 0.1495                               | 0.1247                               | 0.1183                               | 0.4056            | 0.4065            | 0.4069            |
| <sup>202</sup> Hg     | 0.0702            | 0.1530                               | 0.1500                               | 0.0995                               | 0.0688                               | 0.1049                               | 0.1439                               | 0.1516                               | 0.1264                               | 0.1200                               | 0.4060            | 0.4068            | 0.4072            |
| <sup>203</sup> Tl     | 0.9994            | -0.1718                              | -0.1009                              | -0.2016                              | -0.1294                              | -0.0792                              | -0.1367                              | -0.1315                              | -0.1390                              | -0.1005                              | 0.0316            | 0.0317            | 0.0321            |
| <sup>205</sup> Tl     | 1                 | -0.1720                              | -0.1016                              | -0.2024                              | -0.1306                              | -0.0757                              | -0.1330                              | -0.1278                              | -0.1355                              | -0.0970                              | 0.0317            | 0.0318            | 0.0322            |

|                                                     |         |         |         |         |         |         |         |         |         |         |         |         |         |
|-----------------------------------------------------|---------|---------|---------|---------|---------|---------|---------|---------|---------|---------|---------|---------|---------|
| $^{202}\text{Hg}/^{198}\text{Hg}$                   | -0.1720 | 1       | 0.6483  | 0.6681  | 0.5742  | -0.0530 | 0.0640  | 0.1170  | 0.0705  | 0.0662  | 0.0094  | 0.0097  | 0.0095  |
| $^{201}\text{Hg}/^{198}\text{Hg}$                   | -0.1016 | 0.6483  | 1       | 0.6062  | 0.7012  | -0.1508 | -0.0493 | 0.0418  | -0.0335 | -0.0157 | 0.0420  | 0.0424  | 0.0414  |
| $^{200}\text{Hg}/^{198}\text{Hg}$                   | -0.2024 | 0.6681  | 0.6062  | 1       | 0.6872  | -0.1500 | -0.0425 | 0.0178  | -0.0114 | 0.0054  | 0.0373  | 0.0373  | 0.0369  |
| $^{199}\text{Hg}/^{198}\text{Hg}$                   | -0.1306 | 0.5742  | 0.7012  | 0.6872  | 1       | -0.2129 | -0.1224 | -0.0616 | -0.0835 | -0.0370 | 0.0545  | 0.0544  | 0.0536  |
| $^{205}\text{Tl}/^{203}\text{Tl}$                   | -0.0757 | -0.0530 | -0.1508 | -0.1500 | -0.2129 | 1       | 0.8887  | 0.8713  | 0.9199  | 0.9216  | 0.0251  | 0.0254  | 0.0263  |
| $^{202}\text{Hg}/^{198}\text{Hg}(\ast)$             | -0.1330 | 0.0640  | -0.0493 | -0.0425 | -0.1224 | 0.8887  | 1       | 0.9589  | 0.9142  | 0.9173  | 0.0500  | 0.0506  | 0.0514  |
| $^{201}\text{Hg}/^{198}\text{Hg}(\ast)$             | -0.1278 | 0.1170  | 0.0418  | 0.0178  | -0.0616 | 0.8713  | 0.9589  | 1       | 0.8990  | 0.9125  | 0.0487  | 0.0493  | 0.0500  |
| $^{200}\text{Hg}/^{198}\text{Hg}(\ast)$             | -0.1355 | 0.0705  | -0.0335 | -0.0114 | -0.0835 | 0.9199  | 0.9142  | 0.8990  | 1       | 0.9597  | 0.0456  | 0.0460  | 0.0467  |
| $^{199}\text{Hg}/^{198}\text{Hg}(\ast)$             | -0.0970 | 0.0662  | -0.0157 | 0.0054  | -0.0370 | 0.9216  | 0.9173  | 0.9125  | 0.9597  | 1       | 0.0496  | 0.0501  | 0.0508  |
| StdErr(abs) $^{198}\text{Hg}$                       | 0.0317  | 0.0094  | 0.0420  | 0.0373  | 0.0545  | 0.0251  | 0.0500  | 0.0487  | 0.0456  | 0.0496  | 1       | 0.9985  | 0.9965  |
| StdErr(abs) $^{199}\text{Hg}$                       | 0.0318  | 0.0097  | 0.0424  | 0.0373  | 0.0544  | 0.0254  | 0.0506  | 0.0493  | 0.0460  | 0.0501  | 0.9985  | 1       | 0.9980  |
| StdErr(abs) $^{200}\text{Hg}$                       | 0.0322  | 0.0095  | 0.0414  | 0.0369  | 0.0536  | 0.0263  | 0.0514  | 0.0500  | 0.0467  | 0.0508  | 0.9965  | 0.9980  | 1       |
| StdErr(abs) $^{201}\text{Hg}$                       | 0.0321  | 0.0088  | 0.0406  | 0.0369  | 0.0536  | 0.0284  | 0.0536  | 0.0520  | 0.0487  | 0.0529  | 0.9955  | 0.9970  | 0.9981  |
| StdErr(abs) $^{202}\text{Hg}$                       | 0.0322  | 0.0089  | 0.0405  | 0.0374  | 0.0544  | 0.0292  | 0.0536  | 0.0522  | 0.0496  | 0.0538  | 0.9940  | 0.9955  | 0.9956  |
| StdErr(abs) $^{203}\text{Tl}$                       | 0.4015  | -0.0498 | -0.1420 | -0.0504 | -0.1567 | -0.0317 | -0.0480 | -0.0547 | -0.0247 | -0.0540 | 0.1356  | 0.1358  | 0.1362  |
| StdErr(abs) $^{205}\text{Tl}$                       | 0.4005  | -0.0506 | -0.1419 | -0.0505 | -0.1579 | -0.0321 | -0.0485 | -0.0549 | -0.0253 | -0.0546 | 0.1353  | 0.1355  | 0.1359  |
| StdErr(abs) $^{202}\text{Hg}/^{198}\text{Hg}$       | -0.0449 | -0.0578 | -0.1026 | -0.0533 | -0.0769 | 0.0578  | 0.0648  | 0.0622  | 0.0553  | 0.0588  | -0.1932 | -0.1935 | -0.1931 |
| StdErr(abs) $^{201}\text{Hg}/^{198}\text{Hg}$       | 0.0109  | -0.0948 | -0.1308 | -0.0770 | -0.0928 | 0.0405  | 0.0390  | 0.0358  | 0.0298  | 0.0370  | -0.2225 | -0.2227 | -0.2222 |
| StdErr(abs) $^{200}\text{Hg}/^{198}\text{Hg}$       | 0.0548  | -0.1154 | -0.1551 | -0.1018 | -0.1108 | 0.0401  | 0.0320  | 0.0245  | 0.0236  | 0.0317  | -0.2312 | -0.2315 | -0.2310 |
| StdErr(abs) $^{199}\text{Hg}/^{198}\text{Hg}$       | 0.0673  | -0.1177 | -0.1562 | -0.0943 | -0.1146 | 0.0232  | 0.0156  | 0.0032  | 0.0095  | 0.0190  | -0.2362 | -0.2364 | -0.2360 |
| StdErr(abs) $^{205}\text{Tl}/^{203}\text{Tl}$       | -0.0782 | 0.0559  | 0.0104  | 0.0075  | -0.0104 | -0.0066 | 0.0103  | 0.0130  | 0.0203  | 0.0098  | 0.0779  | 0.0777  | 0.0770  |
| StdErr(abs) $^{202}\text{Hg}/^{198}\text{Hg}(\ast)$ | 0.0248  | -0.0340 | -0.1280 | -0.0407 | -0.1237 | -0.0929 | -0.0994 | -0.1190 | -0.0938 | -0.1286 | -0.0705 | -0.0705 | -0.0701 |
| R-THg(%)                                            | 0.0201  | 0.0044  | -0.0159 | -0.0006 | -0.0142 | -0.0087 | -0.0119 | -0.0111 | -0.0133 | -0.0099 | -0.0359 | -0.0355 | -0.0350 |
| d199(‰)                                             | 0.0432  | 0.1424  | 0.1399  | 0.1609  | 0.1827  | -0.0290 | -0.0171 | -0.0106 | -0.0077 | 0.0044  | 0.0105  | 0.0115  | 0.0118  |
| d200(‰)                                             | 0.0198  | 0.1226  | 0.1146  | 0.1479  | 0.1176  | -0.0136 | 0.0044  | 0.0099  | 0.0092  | 0.0103  | 0.0137  | 0.0141  | 0.0145  |
| d201(‰)                                             | 0.0106  | 0.1062  | 0.1149  | 0.1171  | 0.1034  | -0.0063 | 0.0083  | 0.0152  | 0.0106  | 0.0130  | 0.0056  | 0.0058  | 0.0063  |
| d202(‰)                                             | 0.0831  | 0.2313  | 0.2247  | 0.2291  | 0.1979  | -0.0609 | -0.0498 | -0.0391 | -0.0376 | -0.0270 | 0.0073  | 0.0079  | 0.0082  |
| D199(‰)                                             | -0.0030 | 0.0250  | 0.0250  | 0.0501  | 0.1095  | 0.0081  | 0.0106  | 0.0103  | 0.0127  | 0.0292  | 0.0164  | 0.0168  | 0.0166  |
| D200(‰)                                             | -0.0100 | 0.0230  | 0.0245  | 0.0775  | 0.0519  | 0.0127  | 0.0151  | 0.0225  | 0.0273  | 0.0258  | 0.0106  | 0.0109  | 0.0103  |
| D201(‰)                                             | 0.0070  | 0.0149  | 0.0727  | 0.0502  | 0.0558  | 0.0031  | 0.0096  | 0.0211  | 0.0126  | 0.0162  | 0.0168  | 0.0168  | 0.0161  |

|                       | StdErr(ab<br>s) <sup>201</sup> Hg | StdErr(ab<br>s) <sup>202</sup> Hg | StdErr(ab<br>s) <sup>203</sup> Tl | StdErr(ab<br>s) <sup>205</sup> Tl | StdErr(abs)<br><sup>202</sup> Hg/ <sup>198</sup> Hg | StdErr(abs)<br><sup>201</sup> Hg/ <sup>198</sup> Hg | StdErr(abs)<br><sup>200</sup> Hg/ <sup>198</sup> Hg | StdErr(abs)<br><sup>199</sup> Hg/ <sup>198</sup> Hg | StdErr(abs)<br><sup>205</sup> Tl/ <sup>203</sup> Tl | StdErr(abs) <sup>202</sup><br>Hg/ <sup>198</sup> Hg(*) | R-THg(<br>%) | d199(‰) |
|-----------------------|-----------------------------------|-----------------------------------|-----------------------------------|-----------------------------------|-----------------------------------------------------|-----------------------------------------------------|-----------------------------------------------------|-----------------------------------------------------|-----------------------------------------------------|--------------------------------------------------------|--------------|---------|
| Extraction[V]         | 0.0060                            | 0.0080                            | -0.0119                           | -0.0121                           | 0.0179                                              | 0.0133                                              | 0.0212                                              | 0.0228                                              | -0.0206                                             | 0.0095                                                 | -0.0016      | -0.0057 |
| Focus[V]              | -0.0028                           | -0.0027                           | -0.0032                           | -0.0028                           | -0.0173                                             | 0.0028                                              | 0.0286                                              | 0.0487                                              | -0.1323                                             | 0.0075                                                 | 0.0167       | 0.0244  |
| Source Quad1[V]       | -0.1140                           | -0.1139                           | -0.0571                           | -0.0566                           | 0.0338                                              | 0.0368                                              | 0.0339                                              | 0.0298                                              | 0.0461                                              | -0.0187                                                | -0.0005      | -0.0491 |
| Rot-Quad1[V]          | 0.0087                            | 0.0091                            | 0.0988                            | 0.1011                            | -0.0229                                             | -0.0039                                             | -0.0090                                             | -0.0321                                             | 0.0434                                              | -0.0147                                                | -0.0106      | -0.0117 |
| Foc-Quad1[V]          | -0.0173                           | -0.0183                           | -0.0132                           | -0.0121                           | 0.1328                                              | 0.1365                                              | 0.1413                                              | 0.1405                                              | 0.1400                                              | -0.0020                                                | 0.0053       | 0.0175  |
| Rot-Quad2[V]          | -0.0187                           | -0.0180                           | -0.0678                           | -0.0659                           | 0.0248                                              | 0.0180                                              | 0.0008                                              | -0.0264                                             | -0.0512                                             | -0.0589                                                | -0.0211      | -0.0486 |
| Source Offset[V]      | 0.0031                            | 0.0031                            | -0.1206                           | -0.1225                           | -0.0152                                             | -0.0407                                             | -0.0466                                             | -0.0436                                             | 0.0225                                              | 0.0360                                                 | 0.0226       | 0.0146  |
| Matsuda Plate[V]      | -0.0275                           | -0.0285                           | -0.0239                           | -0.0229                           | 0.1365                                              | 0.1423                                              | 0.1487                                              | 0.1483                                              | 0.1360                                              | 0.0002                                                 | 0.0069       | 0.0159  |
| Cool Gas[l/min]       | 0.0415                            | 0.0413                            | 0.0325                            | 0.0348                            | 0.0060                                              | -0.0143                                             | -0.0337                                             | -0.0429                                             | 0.0681                                              | -0.0186                                                | -0.0135      | -0.0180 |
| Aux Gas[l/min]        | -0.0630                           | -0.0634                           | 0.1619                            | 0.1620                            | 0.1086                                              | 0.1263                                              | 0.1168                                              | 0.1427                                              | -0.0097                                             | 0.0394                                                 | -0.0056      | -0.0229 |
| Sample Gas[l/min]     | -0.2053                           | -0.2057                           | -0.1483                           | -0.1499                           | 0.0290                                              | 0.0278                                              | 0.0379                                              | 0.0314                                              | -0.0438                                             | 0.0875                                                 | -0.0012      | 0.0170  |
| Add Gas[l/min]        | -0.0286                           | -0.0282                           | -0.0803                           | -0.0804                           | 0.0680                                              | 0.0530                                              | 0.0468                                              | 0.0396                                              | -0.0251                                             | -0.0151                                                | 0.0029       | -0.0115 |
| Org Gas[l/min]        | 0.1929                            | 0.1926                            | 0.0406                            | 0.0424                            | -0.0873                                             | -0.0604                                             | -0.0540                                             | -0.0351                                             | -0.0815                                             | 0.0351                                                 | 0.0017       | 0.0195  |
| Operation Power[W]    | -0.0312                           | -0.0314                           | -0.2032                           | -0.2048                           | -0.0641                                             | -0.0590                                             | -0.0547                                             | -0.0526                                             | -0.0360                                             | 0.0245                                                 | 0.0204       | 0.0063  |
| X-Pos[mm]             | -0.0605                           | -0.0608                           | -0.1850                           | -0.1854                           | 0.0637                                              | 0.0903                                              | 0.0901                                              | 0.1049                                              | -0.0503                                             | 0.0907                                                 | 0.0010       | 0.0317  |
| Y-Pos[mm]             | -0.0572                           | -0.0577                           | -0.1507                           | -0.1513                           | 0.0502                                              | 0.0804                                              | 0.0854                                              | 0.1041                                              | -0.0535                                             | 0.0924                                                 | 0.0070       | 0.0386  |
| Z-Pos[mm]             | -0.0731                           | -0.0735                           | -0.1709                           | -0.1711                           | 0.0501                                              | 0.0793                                              | 0.0810                                              | 0.0981                                              | -0.0797                                             | 0.0785                                                 | 0.0045       | 0.0290  |
| Ampl.-Temp[°C]        | -0.0871                           | -0.0877                           | 0.0482                            | 0.0474                            | 0.0646                                              | 0.0585                                              | 0.0725                                              | 0.0679                                              | 0.0494                                              | 0.1601                                                 | 0.0036       | 0.0308  |
| Fore Vacuum[mbar]     | 0.0429                            | 0.0432                            | -0.1010                           | -0.0989                           | -0.0695                                             | -0.0901                                             | -0.1142                                             | -0.1190                                             | 0.0538                                              | -0.0401                                                | -0.0274      | -0.0062 |
| High Vacuum[mbar]     | -0.0767                           | -0.0775                           | -0.0203                           | -0.0185                           | 0.0781                                              | 0.0849                                              | 0.0819                                              | 0.0989                                              | 0.1237                                              | 0.0057                                                 | -0.0066      | 0.0272  |
| IonGetter-Press[mbar] | -0.0964                           | -0.0959                           | -0.0265                           | -0.0261                           | 0.0384                                              | 0.0332                                              | 0.0391                                              | 0.0257                                              | 0.0600                                              | 0.0002                                                 | -0.0305      | -0.0224 |
| <sup>198</sup> Hg     | 0.4095                            | 0.4107                            | 0.1083                            | 0.1092                            | -0.3859                                             | -0.4436                                             | -0.4763                                             | -0.5182                                             | 0.0154                                              | -0.2213                                                | 0.0452       | 0.0155  |
| <sup>199</sup> Hg     | 0.4086                            | 0.4099                            | 0.1083                            | 0.1092                            | -0.3856                                             | -0.4438                                             | -0.4761                                             | -0.5183                                             | 0.0149                                              | -0.2225                                                | 0.0449       | 0.0152  |
| <sup>200</sup> Hg     | 0.4091                            | 0.4103                            | 0.1088                            | 0.1096                            | -0.3852                                             | -0.4430                                             | -0.4753                                             | -0.5176                                             | 0.0154                                              | -0.2213                                                | 0.0448       | 0.0146  |
| <sup>201</sup> Hg     | 0.4080                            | 0.4092                            | 0.1088                            | 0.1096                            | -0.3845                                             | -0.4428                                             | -0.4754                                             | -0.5178                                             | 0.0146                                              | -0.2228                                                | 0.0438       | 0.0143  |
| <sup>202</sup> Hg     | 0.4083                            | 0.4095                            | 0.1093                            | 0.1101                            | -0.3841                                             | -0.4422                                             | -0.4748                                             | -0.5171                                             | 0.0149                                              | -0.2229                                                | 0.0439       | 0.0148  |
| <sup>203</sup> Tl     | 0.0320                            | 0.0321                            | 0.4014                            | 0.4004                            | -0.0450                                             | 0.0107                                              | 0.0547                                              | 0.0673                                              | -0.0781                                             | 0.0253                                                 | 0.0204       | 0.0431  |
| <sup>205</sup> Tl     | 0.0321                            | 0.0322                            | 0.4015                            | 0.4005                            | -0.0449                                             | 0.0109                                              | 0.0548                                              | 0.0673                                              | -0.0782                                             | 0.0248                                                 | 0.0201       | 0.0432  |

|                                                     |         |         |         |         |         |         |         |         |         |         |         |         |
|-----------------------------------------------------|---------|---------|---------|---------|---------|---------|---------|---------|---------|---------|---------|---------|
| $^{202}\text{Hg}/^{198}\text{Hg}$                   | 0.0088  | 0.0089  | -0.0498 | -0.0506 | -0.0578 | -0.0948 | -0.1154 | -0.1177 | 0.0559  | -0.0340 | 0.0044  | 0.1424  |
| $^{201}\text{Hg}/^{198}\text{Hg}$                   | 0.0406  | 0.0405  | -0.1420 | -0.1419 | -0.1026 | -0.1308 | -0.1551 | -0.1562 | 0.0104  | -0.1280 | -0.0159 | 0.1399  |
| $^{200}\text{Hg}/^{198}\text{Hg}$                   | 0.0369  | 0.0374  | -0.0504 | -0.0505 | -0.0533 | -0.0770 | -0.1018 | -0.0943 | 0.0075  | -0.0407 | -0.0006 | 0.1609  |
| $^{199}\text{Hg}/^{198}\text{Hg}$                   | 0.0536  | 0.0544  | -0.1567 | -0.1579 | -0.0769 | -0.0928 | -0.1108 | -0.1146 | -0.0104 | -0.1237 | -0.0142 | 0.1827  |
| $^{205}\text{Tl}/^{203}\text{Tl}$                   | 0.0284  | 0.0292  | -0.0317 | -0.0321 | 0.0578  | 0.0405  | 0.0401  | 0.0232  | -0.0066 | -0.0929 | -0.0087 | -0.0290 |
| $^{202}\text{Hg}/^{198}\text{Hg}(\ast)$             | 0.0536  | 0.0536  | -0.0480 | -0.0485 | 0.0648  | 0.0390  | 0.0320  | 0.0156  | 0.0103  | -0.0994 | -0.0119 | -0.0171 |
| $^{201}\text{Hg}/^{198}\text{Hg}(\ast)$             | 0.0520  | 0.0522  | -0.0547 | -0.0549 | 0.0622  | 0.0358  | 0.0245  | 0.0032  | 0.0130  | -0.1190 | -0.0111 | -0.0106 |
| $^{200}\text{Hg}/^{198}\text{Hg}(\ast)$             | 0.0487  | 0.0496  | -0.0247 | -0.0253 | 0.0553  | 0.0298  | 0.0236  | 0.0095  | 0.0203  | -0.0938 | -0.0133 | -0.0077 |
| $^{199}\text{Hg}/^{198}\text{Hg}(\ast)$             | 0.0529  | 0.0538  | -0.0540 | -0.0546 | 0.0588  | 0.0370  | 0.0317  | 0.0190  | 0.0098  | -0.1286 | -0.0099 | 0.0044  |
| StdErr(abs) $^{198}\text{Hg}$                       | 0.9955  | 0.9940  | 0.1356  | 0.1353  | -0.1932 | -0.2225 | -0.2312 | -0.2362 | 0.0779  | -0.0705 | -0.0359 | 0.0105  |
| StdErr(abs) $^{199}\text{Hg}$                       | 0.9970  | 0.9955  | 0.1358  | 0.1355  | -0.1935 | -0.2227 | -0.2315 | -0.2364 | 0.0777  | -0.0705 | -0.0355 | 0.0115  |
| StdErr(abs) $^{200}\text{Hg}$                       | 0.9981  | 0.9956  | 0.1362  | 0.1359  | -0.1931 | -0.2222 | -0.2310 | -0.2360 | 0.0770  | -0.0701 | -0.0350 | 0.0118  |
| StdErr(abs) $^{201}\text{Hg}$                       | 1       | 0.9976  | 0.1358  | 0.1355  | -0.1922 | -0.2214 | -0.2302 | -0.2347 | 0.0764  | -0.0704 | -0.0352 | 0.0115  |
| StdErr(abs) $^{202}\text{Hg}$                       | 0.9976  | 1       | 0.1363  | 0.1360  | -0.1924 | -0.2219 | -0.2308 | -0.2354 | 0.0758  | -0.0709 | -0.0362 | 0.0110  |
| StdErr(abs) $^{203}\text{Tl}$                       | 0.1358  | 0.1363  | 1       | 0.9963  | 0.0209  | 0.0369  | 0.0502  | 0.0625  | 0.1065  | 0.1521  | -0.0102 | 0.0182  |
| StdErr(abs) $^{205}\text{Tl}$                       | 0.1355  | 0.1360  | 0.9963  | 1       | 0.0185  | 0.0340  | 0.0477  | 0.0594  | 0.1038  | 0.1532  | -0.0104 | 0.0187  |
| StdErr(abs) $^{202}\text{Hg}/^{198}\text{Hg}$       | -0.1922 | -0.1924 | 0.0209  | 0.0185  | 1       | 0.8051  | 0.7816  | 0.6930  | 0.2699  | 0.2750  | -0.0346 | -0.0045 |
| StdErr(abs) $^{201}\text{Hg}/^{198}\text{Hg}$       | -0.2214 | -0.2219 | 0.0369  | 0.0340  | 0.8051  | 1       | 0.8351  | 0.7578  | 0.3106  | 0.2774  | -0.0378 | 0.0001  |
| StdErr(abs) $^{200}\text{Hg}/^{198}\text{Hg}$       | -0.2302 | -0.2308 | 0.0502  | 0.0477  | 0.7816  | 0.8351  | 1       | 0.7895  | 0.2676  | 0.2961  | -0.0434 | -0.0062 |
| StdErr(abs) $^{199}\text{Hg}/^{198}\text{Hg}$       | -0.2347 | -0.2354 | 0.0625  | 0.0594  | 0.6930  | 0.7578  | 0.7895  | 1       | 0.2054  | 0.3155  | -0.0409 | 0.0009  |
| StdErr(abs) $^{205}\text{Tl}/^{203}\text{Tl}$       | 0.0764  | 0.0758  | 0.1065  | 0.1038  | 0.2699  | 0.3106  | 0.2676  | 0.2054  | 1       | 0.3128  | -0.0082 | 0.0156  |
| StdErr(abs) $^{202}\text{Hg}/^{198}\text{Hg}(\ast)$ | -0.0704 | -0.0709 | 0.1521  | 0.1532  | 0.2750  | 0.2774  | 0.2961  | 0.3155  | 0.3128  | 1       | -0.0216 | 0.0303  |
| R-THg(%)                                            | -0.0352 | -0.0362 | -0.0102 | -0.0104 | -0.0346 | -0.0378 | -0.0434 | -0.0409 | -0.0082 | -0.0216 | 1       | 0.0414  |
| d199(‰)                                             | 0.0115  | 0.0110  | 0.0182  | 0.0187  | -0.0045 | 0.0001  | -0.0062 | 0.0009  | 0.0156  | 0.0303  | 0.0414  | 1       |
| d200(‰)                                             | 0.0143  | 0.0142  | 0.0112  | 0.0118  | -0.0312 | -0.0249 | -0.0348 | -0.0148 | 0.0122  | 0.0071  | 0.0815  | 0.6272  |
| d201(‰)                                             | 0.0064  | 0.0058  | 0.0133  | 0.0139  | -0.0206 | -0.0148 | -0.0201 | -0.0059 | 0.0134  | 0.0039  | 0.0819  | 0.5596  |
| d202(‰)                                             | 0.0079  | 0.0077  | 0.0294  | 0.0293  | -0.0351 | -0.0273 | -0.0276 | -0.0174 | 0.0211  | 0.0417  | 0.0956  | 0.5849  |
| D199(‰)                                             | 0.0164  | 0.0167  | 0.0038  | 0.0049  | 0.0162  | 0.0211  | 0.0139  | -0.0014 | -0.0021 | 0.0019  | -0.0291 | 0.6296  |
| D200(‰)                                             | 0.0102  | 0.0102  | 0.0030  | 0.0033  | 0.0037  | 0.0188  | 0.0019  | -0.0020 | -0.0058 | -0.0170 | -0.0372 | 0.3310  |
| D201(‰)                                             | 0.0163  | 0.0156  | 0.0127  | 0.0123  | 0.0171  | 0.0193  | 0.0160  | 0.0070  | -0.0084 | -0.0043 | -0.0919 | 0.2364  |

|                                      | d200(‰) | d201(‰) | d202(‰) | D199(‰) | D200(‰) | D201(‰) |
|--------------------------------------|---------|---------|---------|---------|---------|---------|
| Extraction[V]                        | -0.0088 | -0.0058 | -0.0010 | -0.0121 | -0.0113 | 0.0078  |
| Focus[V]                             | 0.0082  | 0.0077  | 0.0584  | -0.0095 | -0.0130 | -0.0038 |
| Source Quad1[V]                      | -0.0256 | -0.0148 | -0.0649 | 0.0074  | 0.0233  | -0.0021 |
| Rot-Quad1[V]                         | -0.0067 | -0.0015 | -0.0351 | 0.0065  | 0.0061  | 0.0019  |
| Foc-Quad1[V]                         | 0.0185  | 0.0196  | 0.0453  | 0.0007  | 0.0068  | 0.0081  |
| Rot-Quad2[V]                         | -0.0246 | -0.0100 | -0.1145 | 0.0211  | 0.0255  | -0.0033 |
| Source Offset[V]                     | 0.0174  | 0.0114  | 0.0564  | -0.0073 | -0.0137 | -0.0020 |
| Matsuda Plate[V]                     | 0.0167  | 0.0186  | 0.0450  | 0.0007  | 0.0069  | 0.0072  |
| Cool Gas[l/min]                      | 0.0001  | 0.0027  | -0.0393 | 0.0137  | 0.0152  | 0.0021  |
| Aux Gas[l/min]                       | -0.0149 | -0.0030 | -0.0608 | 0.0202  | 0.0144  | -0.0077 |
| Sample Gas[l/min]                    | -0.0020 | -0.0069 | 0.0602  | -0.0057 | -0.0111 | -0.0048 |
| Add Gas[l/min]                       | -0.0105 | -0.0039 | -0.0210 | 0.0013  | -0.0042 | -0.0142 |
| Org Gas[l/min]                       | 0.0121  | 0.0080  | 0.0138  | 0.0023  | -0.0041 | 0.0125  |
| Operation Power[W]                   | 0.0092  | 0.0015  | 0.0289  | -0.0065 | -0.0130 | -0.0133 |
| X-Pos[mm]                            | 0.0220  | 0.0086  | 0.0593  | -0.0022 | -0.0017 | 0.0144  |
| Y-Pos[mm]                            | 0.0238  | 0.0085  | 0.0733  | -0.0052 | -0.0061 | 0.0140  |
| Z-Pos[mm]                            | 0.0189  | 0.0073  | 0.0556  | -0.0015 | -0.0020 | 0.0105  |
| Ampl.-Temp[°C]                       | 0.0096  | 0.0084  | 0.0589  | -0.0135 | -0.0080 | 0.0067  |
| Fore Vacuum[mbar]                    | 0.0087  | 0.0075  | -0.0388 | 0.0182  | 0.0181  | 0.0104  |
| High Vacuum[mbar]                    | 0.0213  | 0.0287  | 0.0481  | 0.0122  | 0.0190  | 0.0172  |
| IonGetter-Press[mbar]                | -0.0256 | -0.0250 | -0.0310 | -0.0012 | 0.0036  | -0.0039 |
| <sup>198</sup> Hg                    | 0.0340  | 0.0174  | 0.0408  | -0.0054 | -0.0171 | -0.0141 |
| <sup>199</sup> Hg                    | 0.0330  | 0.0172  | 0.0400  | -0.0049 | -0.0171 | -0.0138 |
| <sup>200</sup> Hg                    | 0.0327  | 0.0172  | 0.0399  | -0.0056 | -0.0181 | -0.0146 |
| <sup>201</sup> Hg                    | 0.0319  | 0.0168  | 0.0387  | -0.0047 | -0.0164 | -0.0128 |
| <sup>202</sup> Hg                    | 0.0322  | 0.0174  | 0.0391  | -0.0047 | -0.0165 | -0.0127 |
| <sup>203</sup> Tl                    | 0.0193  | 0.0104  | 0.0832  | -0.0031 | -0.0103 | 0.0072  |
| <sup>205</sup> Tl                    | 0.0198  | 0.0106  | 0.0831  | -0.0030 | -0.0100 | 0.0070  |
| <sup>202</sup> Hg/ <sup>198</sup> Hg | 0.1226  | 0.1062  | 0.2313  | 0.0250  | 0.0230  | 0.0149  |

|                                                 |         |         |         |         |         |         |
|-------------------------------------------------|---------|---------|---------|---------|---------|---------|
| $^{201}\text{Hg}/^{198}\text{Hg}$               | 0.1146  | 0.1149  | 0.2247  | 0.0250  | 0.0245  | 0.0727  |
| $^{200}\text{Hg}/^{198}\text{Hg}$               | 0.1479  | 0.1171  | 0.2291  | 0.0501  | 0.0775  | 0.0502  |
| $^{199}\text{Hg}/^{198}\text{Hg}$               | 0.1176  | 0.1034  | 0.1979  | 0.1095  | 0.0519  | 0.0558  |
| $^{205}\text{Tl}/^{203}\text{Tl}$               | -0.0136 | -0.0063 | -0.0609 | 0.0081  | 0.0127  | 0.0031  |
| $^{202}\text{Hg}/^{198}\text{Hg}^*$             | 0.0044  | 0.0083  | -0.0498 | 0.0106  | 0.0151  | 0.0096  |
| $^{201}\text{Hg}/^{198}\text{Hg}^*$             | 0.0099  | 0.0152  | -0.0391 | 0.0103  | 0.0225  | 0.0211  |
| $^{200}\text{Hg}/^{198}\text{Hg}^*$             | 0.0092  | 0.0106  | -0.0376 | 0.0127  | 0.0273  | 0.0126  |
| $^{199}\text{Hg}/^{198}\text{Hg}^*$             | 0.0103  | 0.0130  | -0.0270 | 0.0292  | 0.0258  | 0.0162  |
| StdErr(abs) $^{198}\text{Hg}$                   | 0.0137  | 0.0056  | 0.0073  | 0.0164  | 0.0106  | 0.0168  |
| StdErr(abs) $^{199}\text{Hg}$                   | 0.0141  | 0.0058  | 0.0079  | 0.0168  | 0.0109  | 0.0168  |
| StdErr(abs) $^{200}\text{Hg}$                   | 0.0145  | 0.0063  | 0.0082  | 0.0166  | 0.0103  | 0.0161  |
| StdErr(abs) $^{201}\text{Hg}$                   | 0.0143  | 0.0064  | 0.0079  | 0.0164  | 0.0102  | 0.0163  |
| StdErr(abs) $^{202}\text{Hg}$                   | 0.0142  | 0.0058  | 0.0077  | 0.0167  | 0.0102  | 0.0156  |
| StdErr(abs) $^{203}\text{Tl}$                   | 0.0112  | 0.0133  | 0.0294  | 0.0038  | 0.0030  | 0.0127  |
| StdErr(abs) $^{205}\text{Tl}$                   | 0.0118  | 0.0139  | 0.0293  | 0.0049  | 0.0033  | 0.0123  |
| StdErr(abs) $^{202}\text{Hg}/^{198}\text{Hg}$   | -0.0312 | -0.0206 | -0.0351 | 0.0162  | 0.0037  | 0.0171  |
| StdErr(abs) $^{201}\text{Hg}/^{198}\text{Hg}$   | -0.0249 | -0.0148 | -0.0273 | 0.0211  | 0.0188  | 0.0193  |
| StdErr(abs) $^{200}\text{Hg}/^{198}\text{Hg}$   | -0.0348 | -0.0201 | -0.0276 | 0.0139  | 0.0019  | 0.0160  |
| StdErr(abs) $^{199}\text{Hg}/^{198}\text{Hg}$   | -0.0148 | -0.0059 | -0.0174 | -0.0014 | -0.0020 | 0.0070  |
| StdErr(abs) $^{205}\text{Tl}/^{203}\text{Tl}$   | 0.0122  | 0.0134  | 0.0211  | -0.0021 | -0.0058 | -0.0084 |
| StdErr(abs) $^{202}\text{Hg}/^{198}\text{Hg}^*$ | 0.0071  | 0.0039  | 0.0417  | 0.0019  | -0.0170 | -0.0043 |
| R-THg(%)                                        | 0.0815  | 0.0819  | 0.0956  | -0.0291 | -0.0372 | -0.0919 |
| d199(‰)                                         | 0.6272  | 0.5596  | 0.5849  | 0.6296  | 0.3310  | 0.2364  |
| d200(‰)                                         | 1       | 0.7505  | 0.5051  | 0.3184  | 0.4673  | 0.2066  |
| d201(‰)                                         | 0.7505  | 1       | 0.4625  | 0.2963  | 0.3106  | 0.4155  |
| d202(‰)                                         | 0.5051  | 0.4625  | 1       | 0.1419  | 0.0963  | 0.0873  |
| D199(‰)                                         | 0.3184  | 0.2963  | 0.1419  | 1       | 0.5031  | 0.3309  |
| D200(‰)                                         | 0.4673  | 0.3106  | 0.0963  | 0.5031  | 1       | 0.3796  |
| D201(‰)                                         | 0.2066  | 0.4155  | 0.0873  | 0.3309  | 0.3796  | 1       |
