# Supplementary material
Source: Royal Society of Chemistry journal article supplement (doi:10.1039/d5ja00519a)
Supplement: d5ja00519a2.pdf [file d5ja00519a2.pdf]

model\_performance\_basic.xlsx

| Model                  | Train_Ac<br>curacy | Test_Ac<br>curacy | Validation_Ac<br>curacy | Train_Pre<br>cision | Test_Pre<br>cision | Validation_<br>Precision | Train_<br>Recall | Test_<br>Recall | Validation_<br>Recall | Train_F1 | Test_F1 | Validation_<br>F1 | Balanced_<br>Accuracy | CV_Mean |
|------------------------|--------------------|-------------------|-------------------------|---------------------|--------------------|--------------------------|------------------|-----------------|-----------------------|----------|---------|-------------------|-----------------------|---------|
| Random<br>Forest       | 1                  | 0.9984            | 0.9988                  | 1                   | 0.9984             | 0.9988                   | 1                | 0.9984          | 0.9988                | 1        | 0.9984  | 0.9988            | 0.9909                | 0.9811  |
| SVM                    | 0.9793             | 0.9812            | 0.9653                  | 0.9840              | 0.9856             | 0.9706                   | 0.9793           | 0.9812          | 0.9653                | 0.9806   | 0.9824  | 0.9667            | 0.9715                | 0.9442  |
| Logistic<br>Regression | 0.7296             | 0.7351            | 0.7345                  | 0.7441              | 0.7456             | 0.7470                   | 0.7296           | 0.7351          | 0.7345                | 0.7349   | 0.7385  | 0.7390            | 0.6464                | 0.6651  |
