# Supplementary material
Source: Royal Society of Chemistry journal article supplement (doi:10.1039/d5ja00519a)
Supplement: d5ja00519a3.pdf [file d5ja00519a3.pdf]

**model\_performance\_enhanced.xlsx**

| Model                  | Train_Ac<br>curacy | Test_Ac<br>curacy | Validation_Ac<br>curacy | Train_Pre<br>cision | Test_Pre<br>cision | Validation_<br>Precision | Train_<br>Recall | Test_<br>Recall | Validation_<br>Recall | Train_F1 | Test_F1 | Validation_<br>F1 | Balanced_<br>Accuracy | CV_Mean |
|------------------------|--------------------|-------------------|-------------------------|---------------------|--------------------|--------------------------|------------------|-----------------|-----------------------|----------|---------|-------------------|-----------------------|---------|
| Random<br>Forest       | 1                  | 0.9979            | 0.9987                  | 1                   | 0.9979             | 0.9987                   | 1                | 0.9979          | 0.9987                | 1        | 0.9979  | 0.9987            | 0.9907                | 0.9830  |
| SVM                    | 0.8832             | 0.8843            | 0.8705                  | 0.8970              | 0.8979             | 0.8857                   | 0.8832           | 0.8843          | 0.8705                | 0.8758   | 0.8765  | 0.8617            | 0.7579                | 0.7726  |
| Logistic<br>Regression | 0.5587             | 0.5707            | 0.5542                  | 0.6669              | 0.6672             | 0.6638                   | 0.5587           | 0.5707          | 0.5542                | 0.5904   | 0.6008  | 0.5861            | 0.5827                | 0.5994  |
