# Supplementary material
Source: Royal Society of Chemistry journal article supplement (doi:10.1039/d5ja00519a)
Supplement: d5ja00519a4.pdf [file d5ja00519a4.pdf]

model\_results.xlsx

| Model   | Train_Ac<br>curacy | Validation_Ac<br>curacy | Test_Ac<br>curacy | Test_F1<br>_Macro | Test_F1_<br>Weighted | Test_Precision<br>_Normal | Test_Recal<br>l_Normal | Test_F1<br>_Normal | Test_Precision<br>_Abnormal | Test_Recall<br>_Abnormal | Test_F1_<br>Abnormal | CV_Mean | CV_Std | Overfitting<br>_Gap |
|---------|--------------------|-------------------------|-------------------|-------------------|----------------------|---------------------------|------------------------|--------------------|-----------------------------|--------------------------|----------------------|---------|--------|---------------------|
| LR      | 0.7407             | 0.7392                  | 0.7460            | 0.7448            | 0.7415               | 0.6167                    | 0.9995                 | 0.7627             | 0.9994                      | 0.5711                   | 0.7268               | 0.7388  | 0.0043 | -0.0054             |
| RF      | 0.9981             | 0.9953                  | 0.9970            | 0.9969            | 0.9970               | 0.9953                    | 0.9974                 | 0.9963             | 0.9982                      | 0.9967                   | 0.9975               | 0.9933  | 0.0020 | 0.0011              |
| SVM     | 0.7407             | 0.7392                  | 0.7463            | 0.7450            | 0.7417               | 0.6168                    | 1                      | 0.7630             | 1                           | 0.5711                   | 0.7270               | 0.7391  | 0.0043 | -0.0056             |
| KNN     | 1                  | 0.9630                  | 0.9593            | 0.9576            | 0.9592               | 0.9741                    | 0.9251                 | 0.9490             | 0.9500                      | 0.9830                   | 0.9662               | 0.9577  | 0.0035 | 0.0407              |
| DT      | 0.9096             | 0.9018                  | 0.9116            | 0.9047            | 0.9094               | 0.9980                    | 0.7852                 | 0.8789             | 0.8707                      | 0.9989                   | 0.9304               | 0.9081  | 0.0051 | -0.0020             |
| GB      | 0.9776             | 0.9733                  | 0.9784            | 0.9776            | 0.9784               | 0.9839                    | 0.9628                 | 0.9733             | 0.9747                      | 0.9892                   | 0.9819               | 0.9744  | 0.0042 | -0.0008             |
| NB      | 0.6487             | 0.6474                  | 0.6463            | 0.5263            | 0.5700               | 0.8107                    | 0.1750                 | 0.2878             | 0.6305                      | 0.9718                   | 0.7648               | 0.5393  | 0.0116 | 0.0024              |
| XGB     | 0.9777             | 0.9748                  | 0.9790            | 0.9782            | 0.9790               | 0.9924                    | 0.9560                 | 0.9739             | 0.9704                      | 0.9949                   | 0.9825               | 0.9786  | 0.0058 | -0.0014             |
| BagRF   | 0.9951             | 0.9940                  | 0.9951            | 0.9949            | 0.9951               | 0.9948                    | 0.9932                 | 0.9940             | 0.9953                      | 0.9964                   | 0.9958               | 0.9907  | 0.0021 | 0.0000              |
| LR_S    | 0.7807             | 0.7392                  | 0.7460            | 0.7448            | 0.7415               | 0.6167                    | 0.9995                 | 0.7627             | 0.9994                      | 0.5711                   | 0.7268               | 0.7692  | 0.0053 | 0.0347              |
| RF_S    | 0.9967             | 0.9953                  | 0.9961            | 0.9960            | 0.9962               | 0.9922                    | 0.9984                 | 0.9953             | 0.9989                      | 0.9946                   | 0.9967               | 0.9934  | 0.0016 | 0.0005              |
| SVM_S   | 0.7808             | 0.7392                  | 0.7463            | 0.7450            | 0.7417               | 0.6168                    | 1                      | 0.7630             | 1                           | 0.5711                   | 0.7270               | 0.7697  | 0.0054 | 0.0345              |
| KNN_S   | 1                  | 0.9643                  | 0.9621            | 0.9607            | 0.9621               | 0.9601                    | 0.9466                 | 0.9533             | 0.9635                      | 0.9729                   | 0.9681               | 0.9741  | 0.0036 | 0.0379              |
| DT_S    | 0.8993             | 0.9097                  | 0.9247            | 0.9205            | 0.9238               | 0.9609                    | 0.8502                 | 0.9022             | 0.9042                      | 0.9761                   | 0.9388               | 0.8956  | 0.0064 | -0.0254             |
| GB_S    | 0.9720             | 0.9673                  | 0.9705            | 0.9696            | 0.9705               | 0.9506                    | 0.9785                 | 0.9644             | 0.9849                      | 0.9649                   | 0.9748               | 0.9799  | 0.0046 | 0.0015              |
| NB_S    | 0.5911             | 0.6592                  | 0.6588            | 0.5503            | 0.5908               | 0.8340                    | 0.2053                 | 0.3296             | 0.6392                      | 0.9718                   | 0.7711               | 0.5321  | 0.0277 | -0.0677             |
| XGB_S   | 0.9811             | 0.9792                  | 0.9805            | 0.9800            | 0.9806               | 0.9610                    | 0.9927                 | 0.9766             | 0.9948                      | 0.9722                   | 0.9834               | 0.9792  | 0.0033 | 0.0005              |
| BagRF_S | 0.9872             | 0.9829                  | 0.9842            | 0.9837            | 0.9842               | 0.9650                    | 0.9974                 | 0.9809             | 0.9981                      | 0.9750                   | 0.9865               | 0.9797  | 0.0031 | 0.0030              |
| LR_A    | 0.7829             | 0.7392                  | 0.7463            | 0.7450            | 0.7417               | 0.6168                    | 1                      | 0.7630             | 1                           | 0.5711                   | 0.7270               | 0.7709  | 0.0060 | 0.0366              |
| RF_A    | 0.9909             | 0.9887                  | 0.9884            | 0.9881            | 0.9885               | 0.9725                    | 1                      | 0.9861             | 1                           | 0.9805                   | 0.9901               | 0.9868  | 0.0017 | 0.0025              |
| SVM_A   | 0.7829             | 0.7392                  | 0.7463            | 0.7450            | 0.7417               | 0.6168                    | 1                      | 0.7630             | 1                           | 0.5711                   | 0.7270               | 0.7711  | 0.0060 | 0.0366              |
| KNN_A   | 1                  | 0.9600                  | 0.9557            | 0.9545            | 0.9559               | 0.9255                    | 0.9696                 | 0.9470             | 0.9783                      | 0.9461                   | 0.9619               | 0.9704  | 0.0008 | 0.0443              |
| DT_A    | 0.9010             | 0.9003                  | 0.9099            | 0.9065            | 0.9098               | 0.8970                    | 0.8806                 | 0.8887             | 0.9186                      | 0.9302                   | 0.9243               | 0.8933  | 0.0062 | -0.0089             |
| GB_A    | 0.9725             | 0.9694                  | 0.9756            | 0.9749            | 0.9757               | 0.9567                    | 0.9848                 | 0.9706             | 0.9893                      | 0.9693                   | 0.9792               | 0.9701  | 0.0053 | -0.0031             |

|          |        |        |        |        |        |        |        |        |        |        |        |        |        |         |
|----------|--------|--------|--------|--------|--------|--------|--------|--------|--------|--------|--------|--------|--------|---------|
| NB_A     | 0.5912 | 0.6551 | 0.6596 | 0.5772 | 0.6114 | 0.7265 | 0.2672 | 0.3907 | 0.6478 | 0.9306 | 0.7638 | 0.5498 | 0.0183 | -0.0684 |
| XGB_A    | 0.9689 | 0.9653 | 0.9690 | 0.9682 | 0.9691 | 0.9336 | 0.9948 | 0.9632 | 0.9962 | 0.9512 | 0.9732 | 0.9716 | 0.0110 | 0.0000  |
| BagRF_A  | 0.9645 | 0.9566 | 0.9617 | 0.9609 | 0.9619 | 0.9143 | 1      | 0.9552 | 1      | 0.9353 | 0.9665 | 0.9630 | 0.0027 | 0.0028  |
| LR_SE    | 0.8001 | 0.7392 | 0.7460 | 0.7448 | 0.7415 | 0.6167 | 0.9995 | 0.7627 | 0.9994 | 0.5711 | 0.7268 | 0.7925 | 0.0038 | 0.0540  |
| RF_SE    | 0.9957 | 0.9741 | 0.9728 | 0.9721 | 0.9729 | 0.9442 | 0.9921 | 0.9676 | 0.9944 | 0.9595 | 0.9766 | 0.9896 | 0.0025 | 0.0228  |
| SVM_SE   | 0.8001 | 0.7392 | 0.7463 | 0.7450 | 0.7417 | 0.6168 | 1      | 0.7630 | 1      | 0.5711 | 0.7270 | 0.7928 | 0.0040 | 0.0538  |
| KNN_SE   | 1      | 0.9572 | 0.9521 | 0.9502 | 0.9520 | 0.9522 | 0.9293 | 0.9406 | 0.9520 | 0.9678 | 0.9598 | 0.9953 | 0.0007 | 0.0479  |
| DT_SE    | 0.9089 | 0.9056 | 0.9178 | 0.9136 | 0.9171 | 0.9405 | 0.8528 | 0.8945 | 0.9045 | 0.9627 | 0.9327 | 0.9029 | 0.0046 | -0.0089 |
| GB_SE    | 0.9801 | 0.9553 | 0.9596 | 0.9585 | 0.9597 | 0.9241 | 0.9817 | 0.9520 | 0.9868 | 0.9443 | 0.9651 | 0.9794 | 0.0039 | 0.0206  |
| NB_SE    | 0.5965 | 0.6504 | 0.6504 | 0.5343 | 0.5769 | 0.8190 | 0.1849 | 0.3017 | 0.6333 | 0.9718 | 0.7668 | 0.5328 | 0.0277 | -0.0539 |
| XGB_SE   | 0.9865 | 0.9683 | 0.9694 | 0.9686 | 0.9695 | 0.9376 | 0.9911 | 0.9636 | 0.9936 | 0.9544 | 0.9736 | 0.9837 | 0.0031 | 0.0171  |
| BagRF_SE | 0.9831 | 0.9469 | 0.9512 | 0.9503 | 0.9515 | 0.8966 | 0.9953 | 0.9434 | 0.9965 | 0.9208 | 0.9571 | 0.9765 | 0.0022 | 0.0319  |
| LR_U     | 0.7803 | 0.7392 | 0.7460 | 0.7448 | 0.7415 | 0.6167 | 0.9995 | 0.7627 | 0.9994 | 0.5711 | 0.7268 | 0.7688 | 0.0081 | 0.0342  |
| RF_U     | 0.9964 | 0.9936 | 0.9944 | 0.9942 | 0.9944 | 0.9901 | 0.9963 | 0.9932 | 0.9975 | 0.9931 | 0.9953 | 0.9929 | 0.0021 | 0.0020  |
| SVM_U    | 0.7803 | 0.7392 | 0.7463 | 0.7450 | 0.7417 | 0.6168 | 1      | 0.7630 | 1      | 0.5711 | 0.7270 | 0.7691 | 0.0080 | 0.0340  |
| KNN_U    | 1      | 0.9653 | 0.9617 | 0.9603 | 0.9617 | 0.9572 | 0.9487 | 0.9529 | 0.9648 | 0.9707 | 0.9677 | 0.9629 | 0.0028 | 0.0383  |
| DT_U     | 0.9015 | 0.9110 | 0.9251 | 0.9207 | 0.9241 | 0.9687 | 0.8439 | 0.9020 | 0.9010 | 0.9812 | 0.9394 | 0.8988 | 0.0034 | -0.0236 |
| GB_U     | 0.9806 | 0.9775 | 0.9775 | 0.9769 | 0.9776 | 0.9528 | 0.9942 | 0.9731 | 0.9959 | 0.9660 | 0.9807 | 0.9782 | 0.0027 | 0.0031  |
| NB_U     | 0.5791 | 0.6483 | 0.6478 | 0.5292 | 0.5725 | 0.8138 | 0.1786 | 0.2930 | 0.6315 | 0.9718 | 0.7655 | 0.5116 | 0.0137 | -0.0688 |
| XGB_U    | 0.9849 | 0.9816 | 0.9835 | 0.9830 | 0.9835 | 0.9717 | 0.9885 | 0.9800 | 0.9919 | 0.9801 | 0.9860 | 0.9805 | 0.0034 | 0.0014  |
| BagRF_U  | 0.9869 | 0.9827 | 0.9846 | 0.9841 | 0.9846 | 0.9670 | 0.9963 | 0.9814 | 0.9974 | 0.9765 | 0.9868 | 0.9793 | 0.0042 | 0.0023  |

(Abbreviations: S: SMOTE, A: ADASYN, SE: SMOTEENN, U: UnderSampling)
